# Supplementary material for: A rapid, simple, high-performance liquid chromatography method for the clinical measurement of beta-lactam antibiotics in serum and interstitial fluid
Source: Royal Society of Chemistry journal article supplement (doi:10.1039/d2ay01276f), 2023-01-01
Supplement: d2ay01276f1.pdf [file d2ay01276f1.pdf]

A

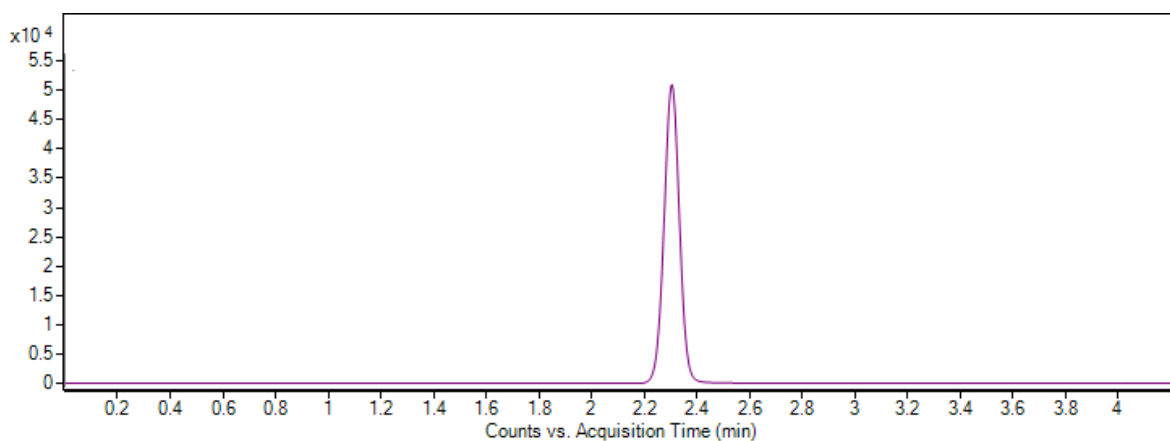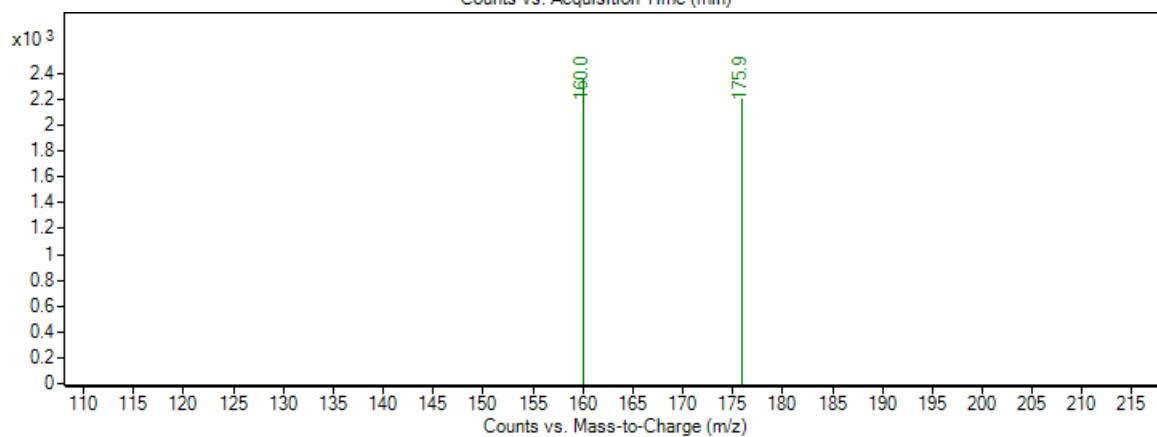

B

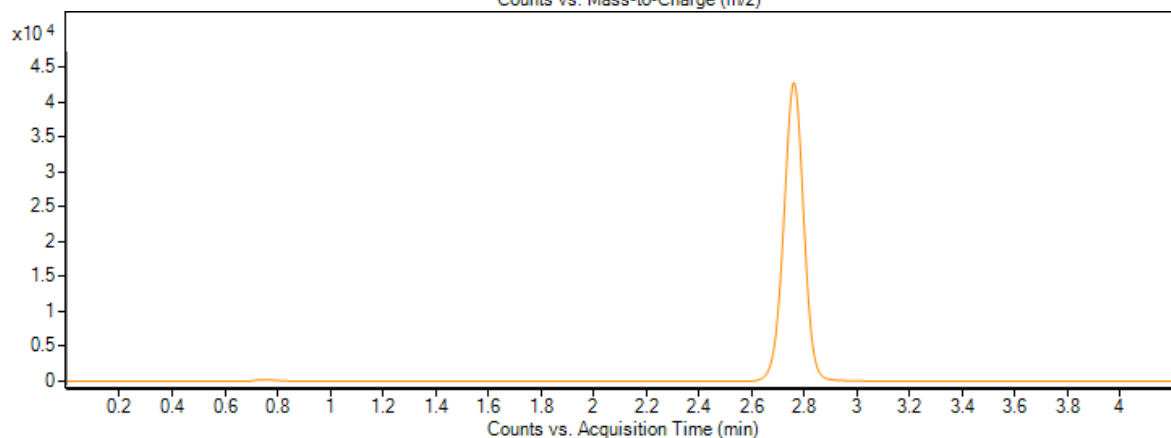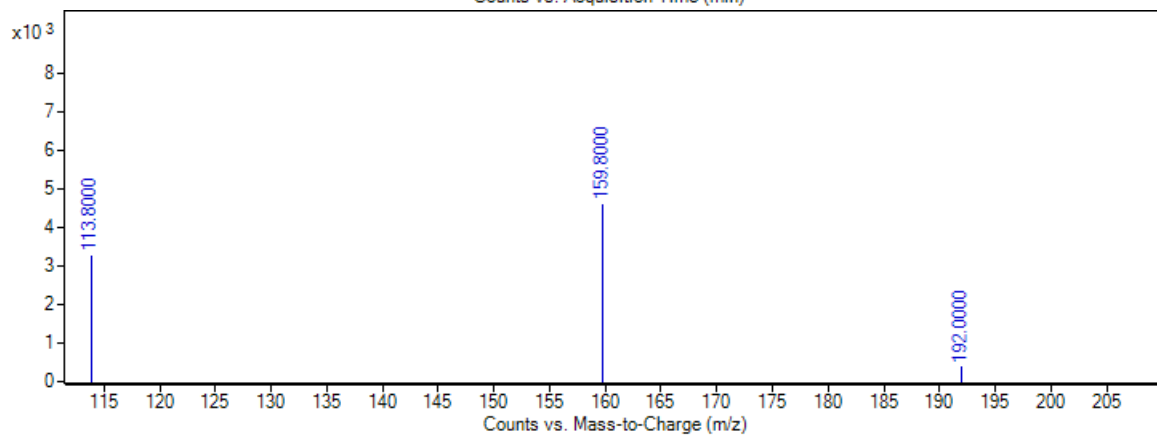

C

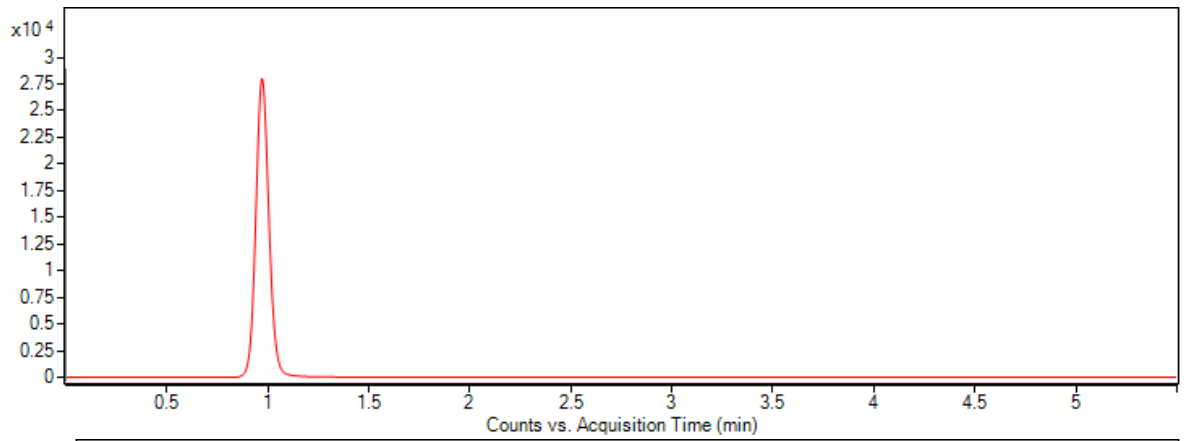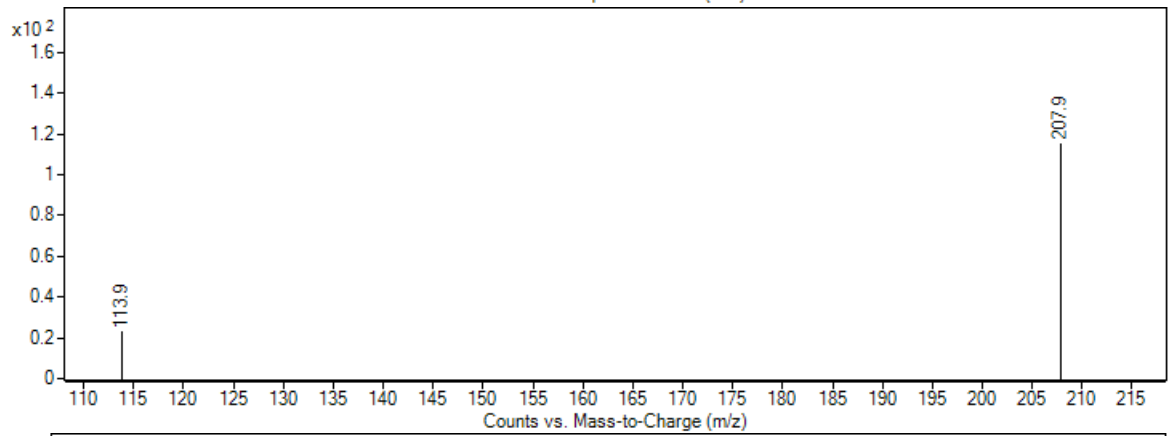

D

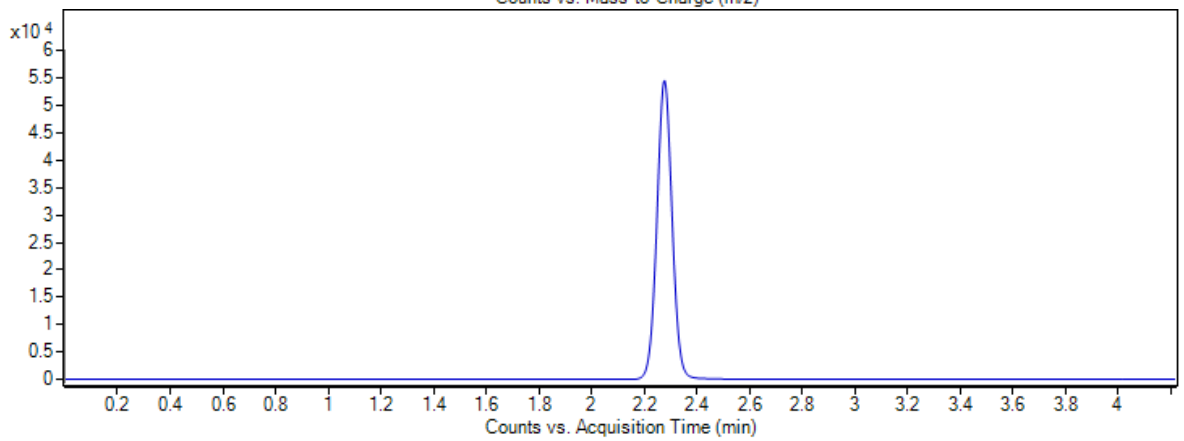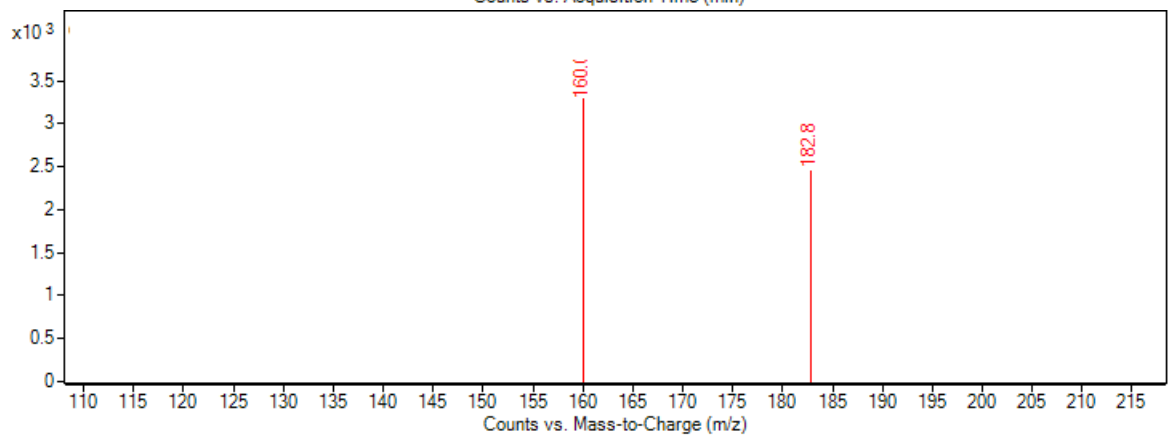

**Fig.1S Chromatograms and mass spectrum in the ISF sample spiked with penicillin G (A), penicillin V(B), amoxicillin (C), IS (D), in which the y-axis indicates the counts (absolute abundance) of ionized molecules and the x-axis indicates retention time**

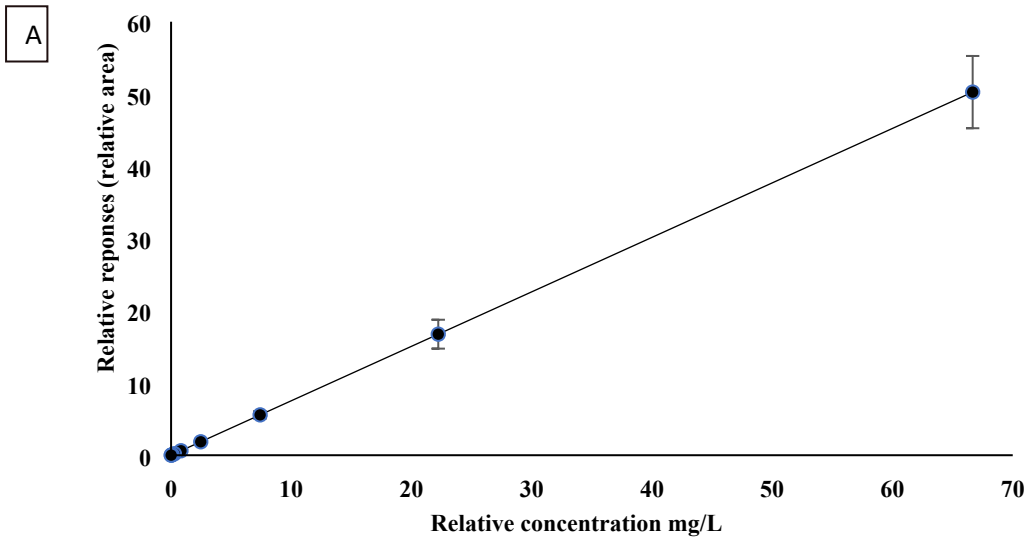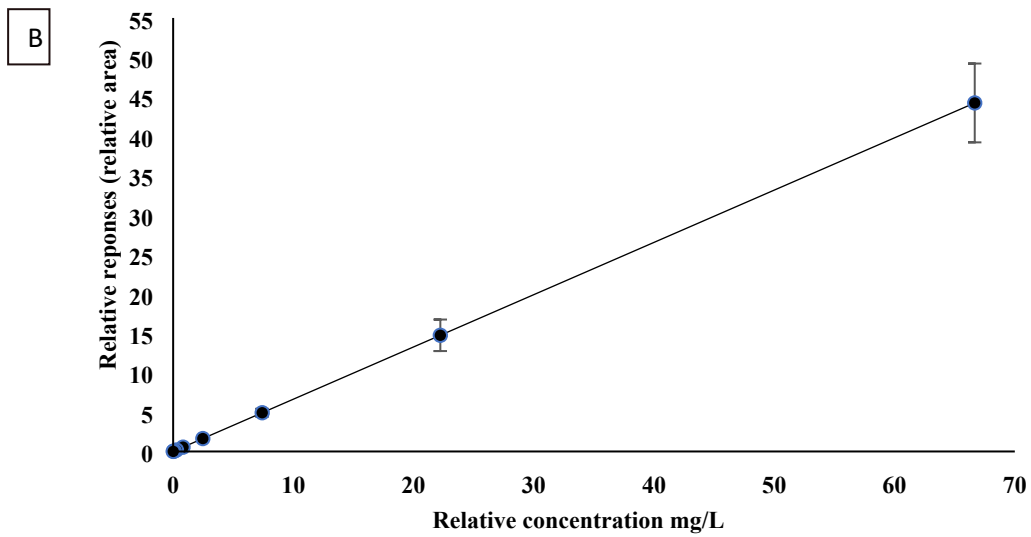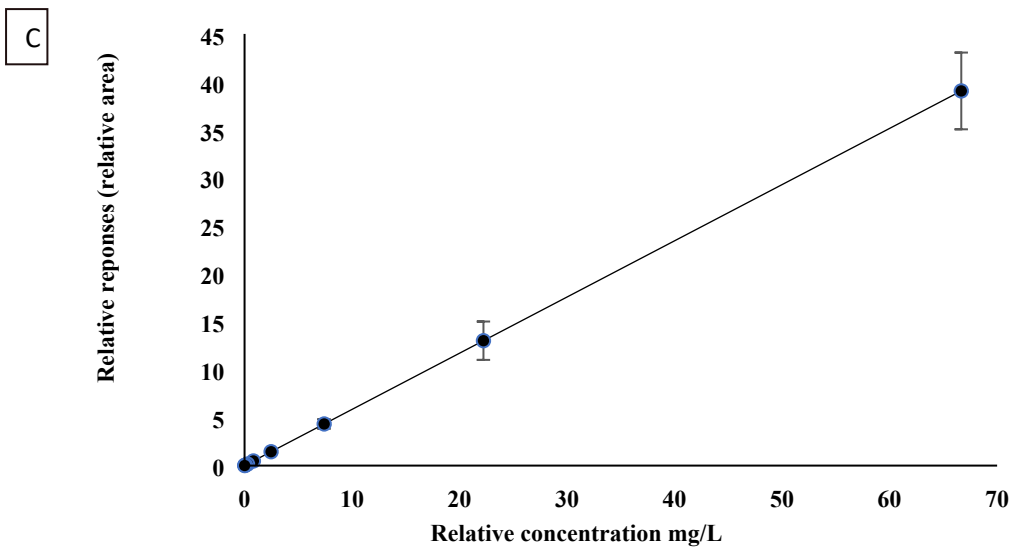

**Fig. 2S** The LC/MS calibration curve showing the relative area of analyte to internal standard plotted against relative concentration analyte to internal standard (IS=0.15 mg/L). Each data point represents the average of six separately prepared spiked standards.

*a* Weighting was 1/x for all analytes.  $R^2$ , coefficient of determination.
